# Supplementary material for: Utilizing Black Soldier Fly Larvae to Improve Bioconversion and Reduce Pollution: A Sustainable Method for Efficient Treatment of Mixed Wastes of Wet Distiller Grains and Livestock Manure
Source: MDPI journal article supplement (doi:10.3390/molecules28155735), 2023-07-28
Supplement: s1 [file s1]

**Table S1.** Selected characteristics of raw materials in this study

| Parameters                      | COM             | PM              | WDG           |
|---------------------------------|-----------------|-----------------|---------------|
| pH                              | 6.29±0.11       | 7.69±0.21       | 4.26±0.22     |
| Total organic carbon (%)        | 3.27±0.06       | 3.35±0.07       | 1.72±0.09     |
| Total Kjeldahl nitrogen (%)     | 43.17±0.12      | 44.48±0.09      | 46.11±0.06    |
| C/N (%)                         | 12.91±0.10      | 12.68±0.28      | 26.44±0.31    |
| TOC (mg/L)                      | 44.10±1.49      | 58.57±0.52      | 324.94±6.04   |
| Total phosphorus content (µg/g) | 13013±43.58     | 17487.49±27.63  | 2394.78±14.66 |
| Al (µg/g)                       | 6876.63±11.50   | 4324.48±9.79    | 214.33±6.07   |
| Ca (µg/g)                       | 27198.67±70.04  | 90227.00±103.55 | 812.98±10.58  |
| Fe (µg/g)                       | 4811.20±4.03    | 5822.01±19.27   | 0             |
| K (µg/g)                        | 26129.00±26.00  | 27909.67±25.58  | 1813.13±10.96 |
| Mg (µg/g)                       | 10228.33±13.65  | 12306.67±17.90  | 1147.20±15.40 |
| Na (µg/g)                       | 12389.33±558.21 | 12154.67±19.09  | 445.56±10.30  |
| Cr (µg/g)                       | 11.75±0.38      | 16.94±1.12      | 1.71±0.02     |
| Mn (µg/g)                       | 568.78±11.77    | 401.23±11.87    | 10.37±0.28    |
| Co (µg/g)                       | 2.17±0.05       | 2.38±0.01       | 0.05±0.01     |
| Ni (µg/g)                       | 4.73±0.16       | 7.04±0.02       | 0.75±0.03     |
| Cu (µg/g)                       | 34.25±2.32      | 188.63±6.03     | 3.65±0.02     |
| Zn (µg/g)                       | 222.93±10.20    | 536.04±5.73     | 34.48±0.12    |
| As (µg/g)                       | 17.22±0.34      | 18.19±0.19      | 14.76±0.30    |
| Mo (µg/g)                       | 2.54±0.13       | 2.93±0.03       | 1.05±0.05     |
| Cd (µg/g)                       | 0.54±0.02       | 0.55±0.01       | 0.24±0.17     |
| Pb (µg/g)                       | 6.26±0.09       | 6.59±0.06       | 0.97±0.02     |
| Si (µg/g)                       | 1150.65±45.06   | 683.31±5.38     | 119.72±0.74   |
| Sr (µg/g)                       | 171.55±5.52     | 226.99±4.14     | 6.06±0.02     |
| Sb (µg/g)                       | 0.57±0.02       | 0.70±0.01       | 0.93±0.03     |
| Cs (µg/g)                       | 0.83±0.03       | 0.97±0.01       | 0.02±0.00     |
| Ba (µg/g)                       | 138.26±4.20     | 62.85±2.58      | 2.84±0.01     |
| Li (µg/g)                       | 4.12±0.05       | 5.10±0.08       | 0.12±0.01     |
| Be (µg/g)                       | 0.22±0.03       | 0.26±0.02       | 0             |
| V (µg/g)                        | 9.94±0.10       | 7.65±0.03       | 0.16±0.01     |
| Ga (µg/g)                       | 2.30±0.07       | 1.74±0.02       | 0.05±0.00     |
| Ge (µg/g)                       | 1.22±0.04       | 0.74±0.02       | 0.02±0.00     |
| Rb (µg/g)                       | 36.18±2.18      | 45.14±2.48      | 1.58±0.02     |
| Sr (µg/g)                       | 125.58±6.20     | 245.02±4.41     | 4.11±0.01     |

Among all statistical tests, the IBM SPSS Statistics 26 (SPSS Inc., USA) software was used with one-way analysis of variance (ANOVA) to consider the BSFL bioconversion wastes as well as the question of excessive heavy metals in raw materials.

Supplementary S1: Experimental design of the study.

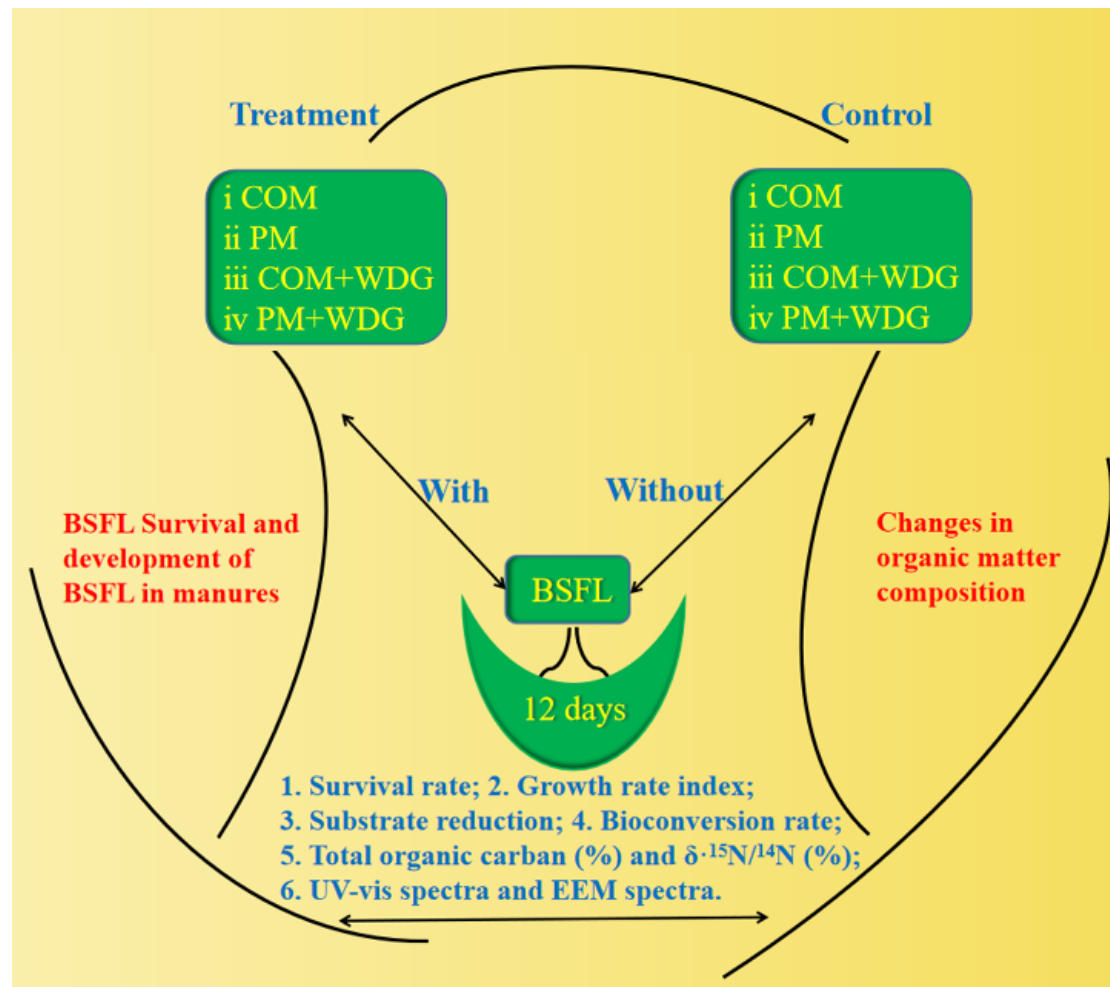

**Figure S1:** N-relevant harmful gas emission after manure treated by BSFL.

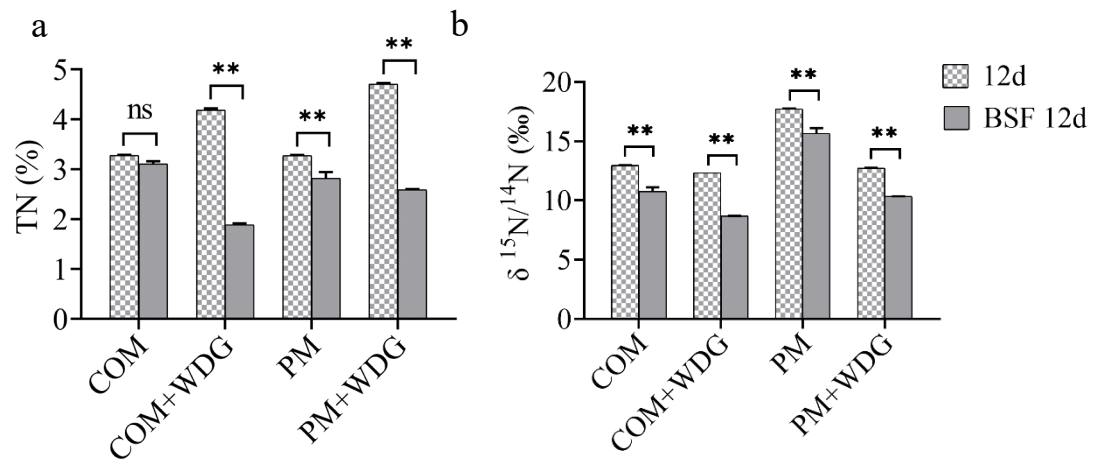

TN content (a) and  $\delta^{15}\text{N}/^{14}\text{N}$  ratio (b) of residual materials in pure and blended manures, \* $P < 0.05$ ; \*\* $P < 0.01$ .

**Table S2.** The phytotoxicity study of waste residues in rape.

| Treatment | Relative germination<br>percentage (%) | GI (%)       |
|-----------|----------------------------------------|--------------|
| COM       | 100%                                   | 154.76±1.45b |
| COM+WDG   | 100%                                   | 123.64±1.12d |
| PM        | 100%                                   | 131.97±1.12c |
| PM+WDG    | 100%                                   | 164.46±1.80a |

Average and standard deviation (n = 3) are displayed. Different letters indicate significant differences amongst different treatments ( $P < 0.05$ ).

**Table S3.** Micro nutrient composition of manure/compost produced by BSFL.

| Sample | Major element |           |           |           |           |        |        | Trace element |        |       |        |       |        |
|--------|---------------|-----------|-----------|-----------|-----------|--------|--------|---------------|--------|-------|--------|-------|--------|
|        | TP            | Ca        | K         | Mg        | Na        | Zn     | Cu     | Fe            | Mn     | Mo    | Ni     | Co    | Cr     |
| COM    | 14194.21±     | 23974.39± | 29253.29± | 12006.00± | 11943.72± | 229.96 | 37.45± | 5250.74±      | 638.86 | 3.15± | 20.74± | 2.45± | 46.80± |
|        | 198.23b       | 61.87c    | 137.47a   | 133.80a   | 105.35a   | ±5.23d | 1.41b  | 52.63b        | ±5.74b | 0.09b | 0.84a  | 0.18a | 1.02a  |
| COM+   | 13047.95±     | 18417.98± | 25282.33± | 11633.01± | 11302.07± | 339.46 | 30.88± | 4835.69±      | 451.24 | 2.63± | 5.24±0 | 2.13± | 12.07± |
| WDG    | 115.83d       | 105.98d   | 132.20b   | 112.55a   | 73.44b    | ±2.92c | 1.47b  | 104.93c       | ±3.87c | 0.20c | .21c   | 0.12a | 0.08c  |
| PM     | 16275.40±     | 83025.64± | 22206.66± | 12071.22± | 10537.57± | 419.91 | 173.63 | 6486.80±      | 406.97 | 3.65± | 18.43± | 2.42± | 34.08± |
|        | 110.72a       | 74.94a    | 92.65c    | 106.43a   | 60.88c    | ±7.13a | ±3.91a | 86.94a        | ±3.04d | 0.12a | 0.22a  | 0.13a | 0.63b  |
| PM+W   | 13546.98±     | 52620.26± | 13644.34± | 5476.50±6 | 3089.24±4 | 371.61 | 20.09± | 1309.45±      | 791.61 | 1.37± | 5.45±0 | 0.51± | 4.00±0 |
| DG     | 155.09c       | 137.30b   | 135.01d   | 9.32b     | 4.32d     | ±6.48b | 0.60c  | 72.06d        | ±1.39a | 0.06d | .22c   | 0.02b | .16d   |

Average and standard deviation (n = 3) are displayed. Different letters indicate significant differences amongst different treatments ( $P < 0.05$ ).
